# Supplementary material for: UBE2O reduces the effectiveness of interferon-α via degradation of IFIT3 in hepatocellular carcinoma
Source: PubMed Central journal article supplement (PMC10740027; doi:10.1038/s41419-023-06369-9), 2023-12-21

Figure S1

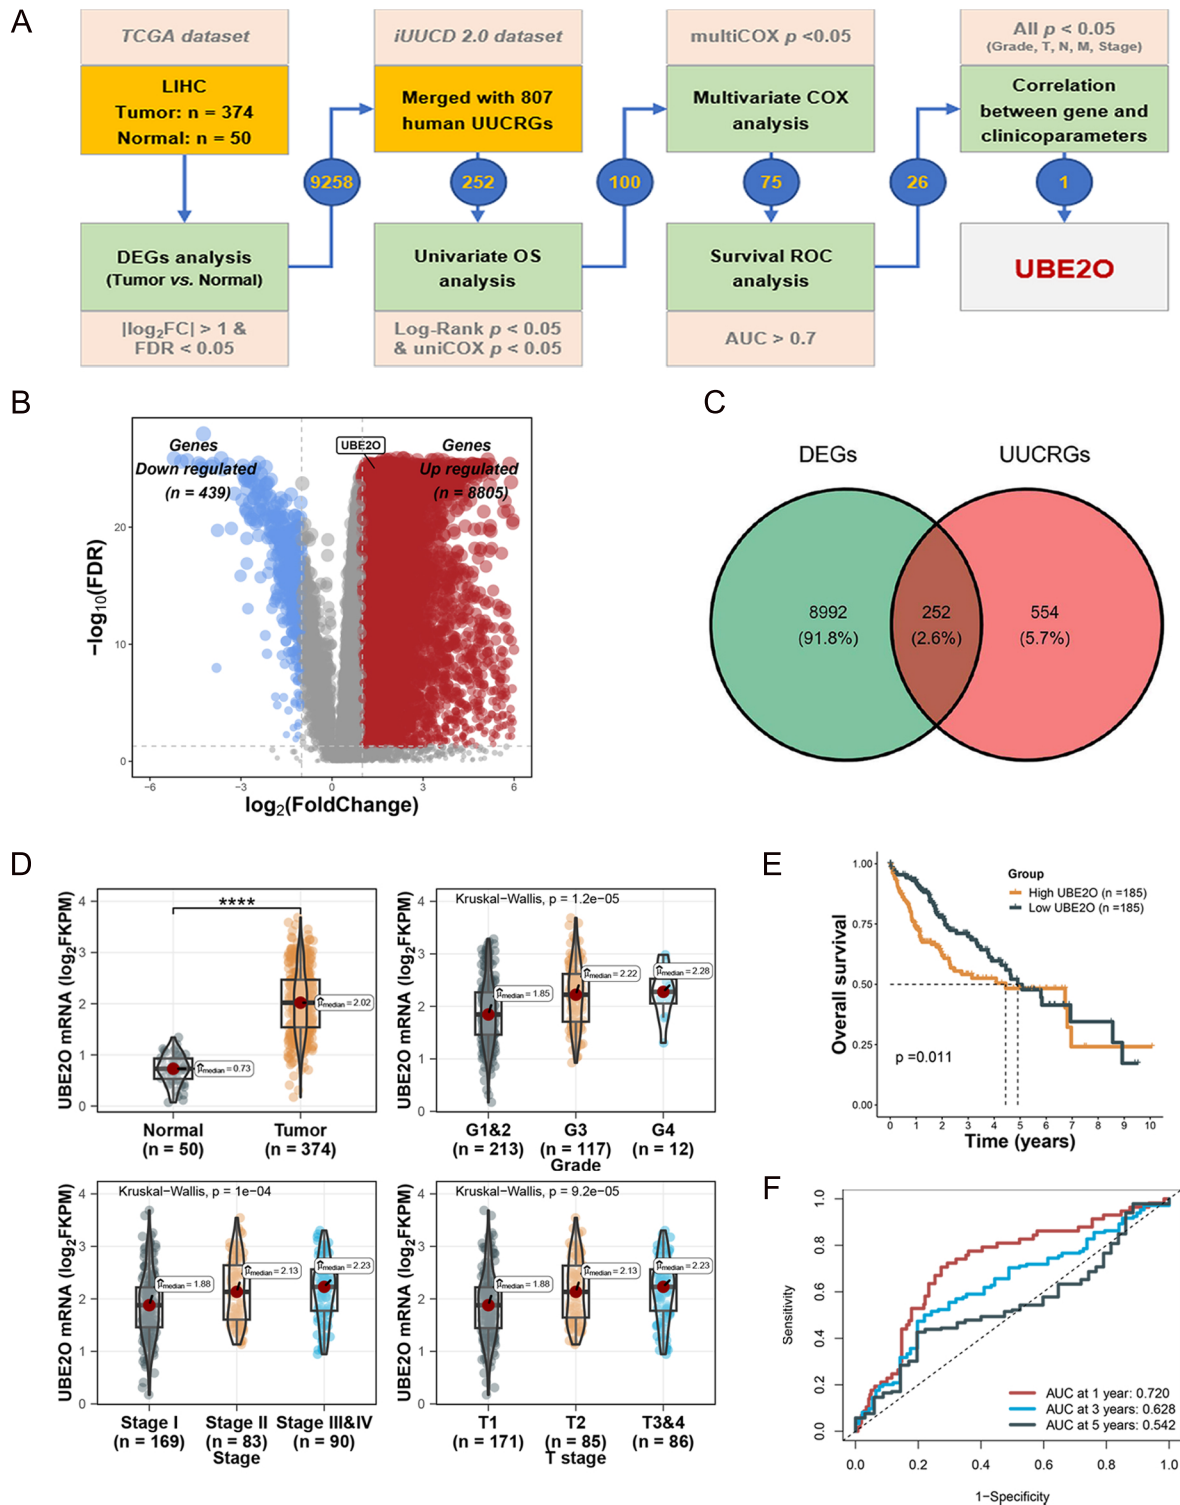

Figure S2

A

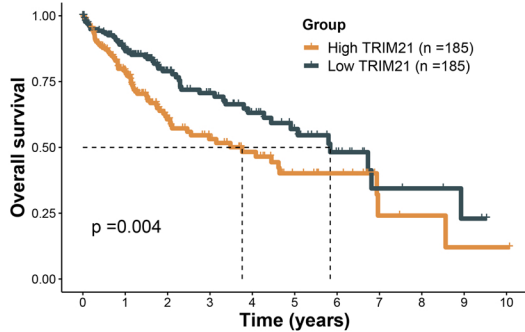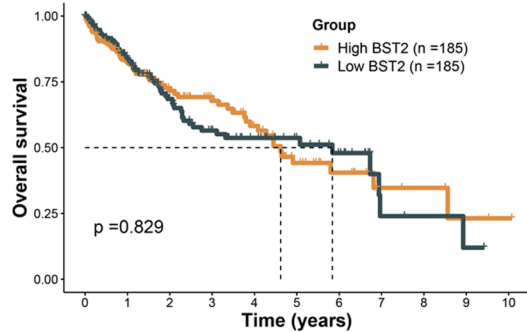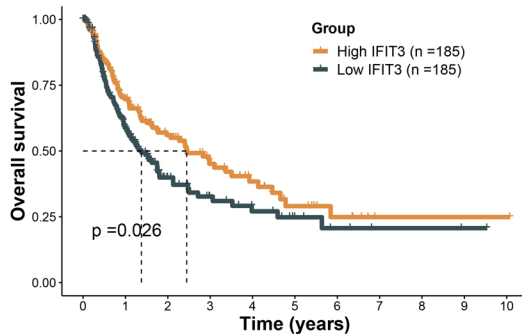

B

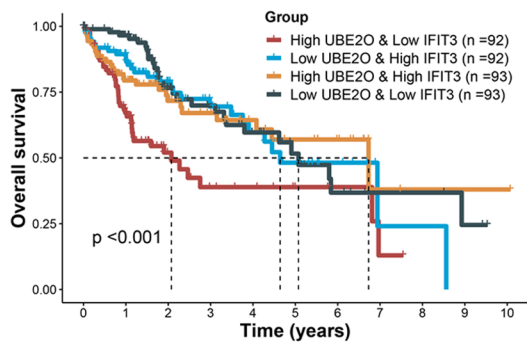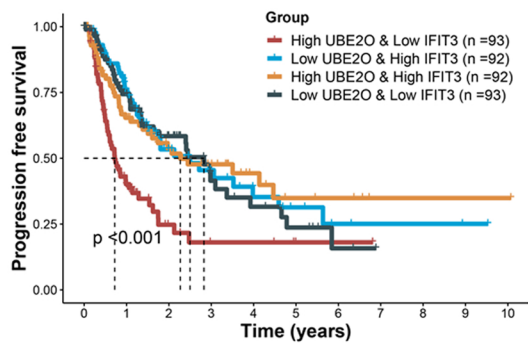

# Figure S3

## A

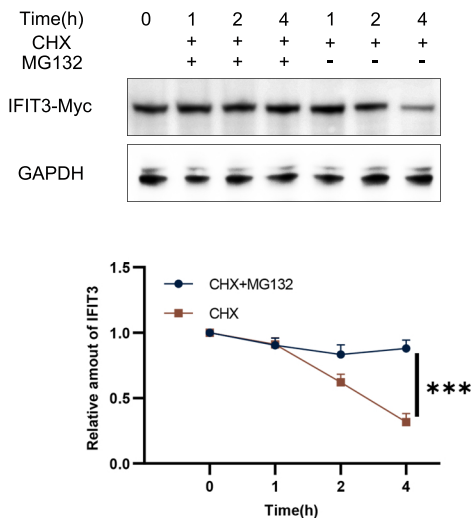

## B

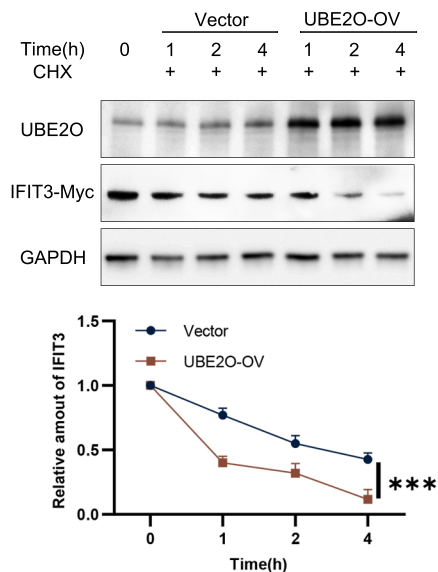

## C

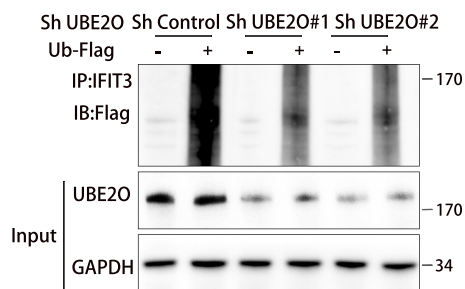

## D

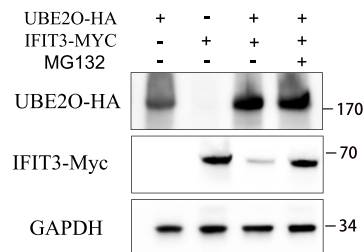

## F

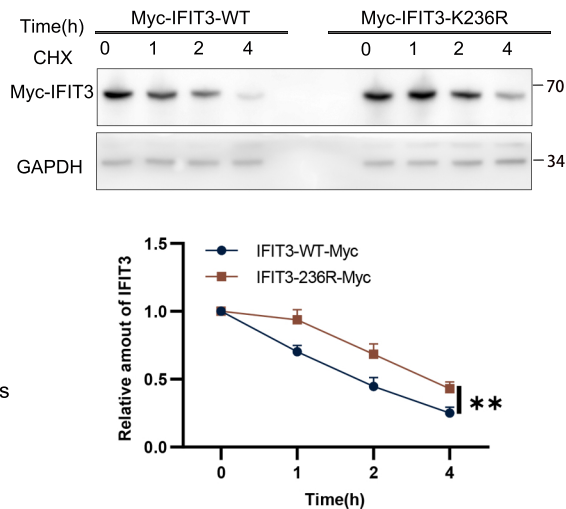

## E

GEQFVEEAL**K** SPCQTDVLRSAAKFY----- Homo sapiens  
 GEQLVEEAL**K** APCQTDVLRSAAKFY----- Pongo abelii  
 AERLVEDAL**K** GPNQTDVLQKAAQFY---- Rattus norvegicus  
 GEQFVKEAL**K** APCQTDVLRSAANFY----- Oryctolagus cuniculus  
 GEQFVEEAL**K** APCQTDVLRSAAKFY----- Pan troglodytes

# Figure S4

## A

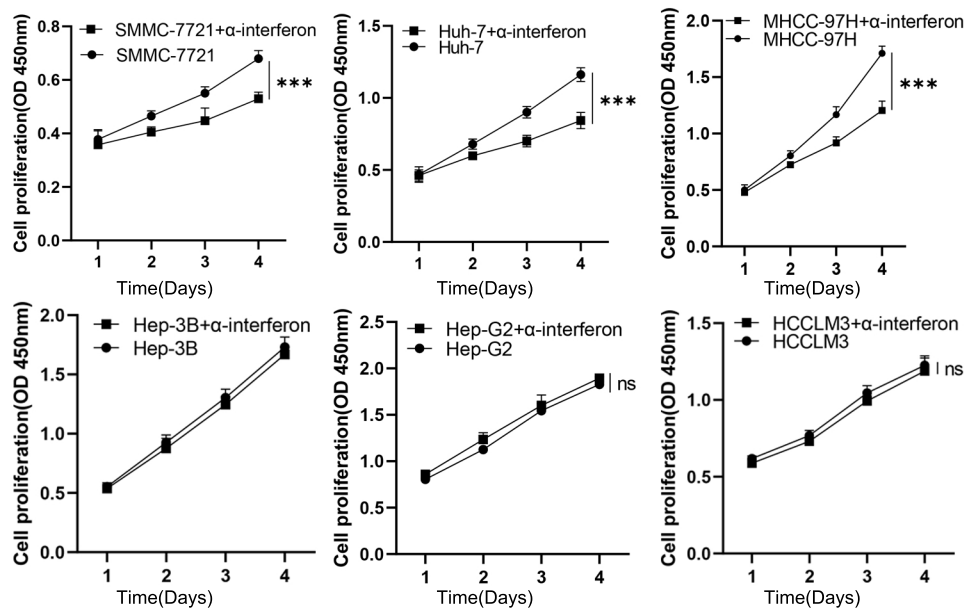

## B

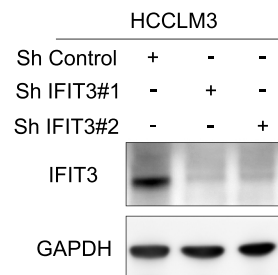

## C

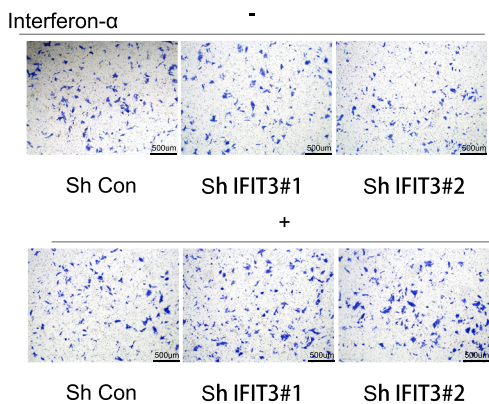

## D

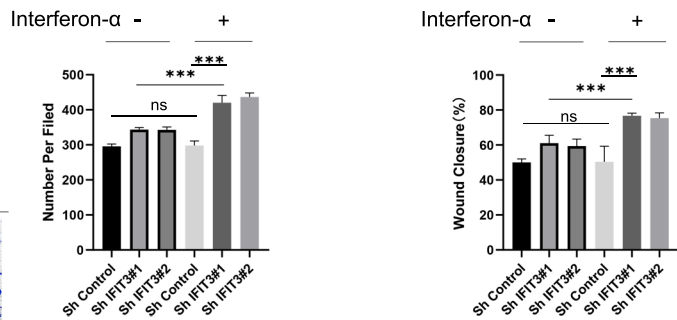

## E

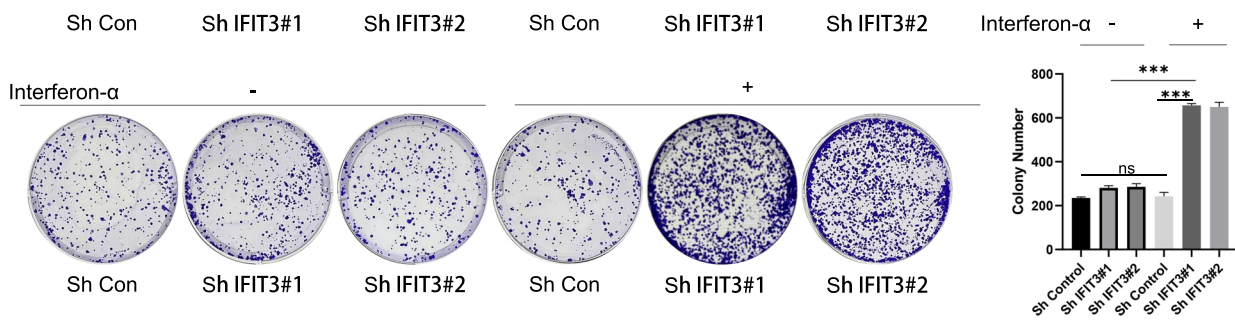

Figure S5

A

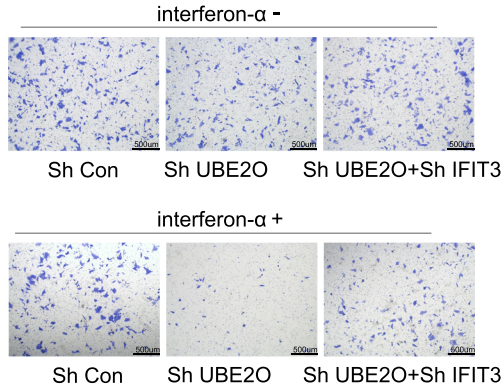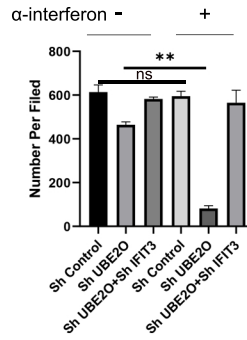

B

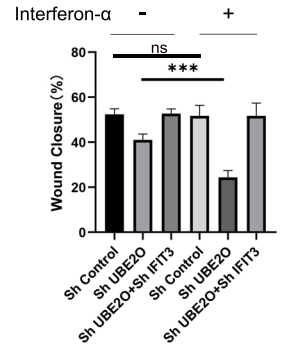

C

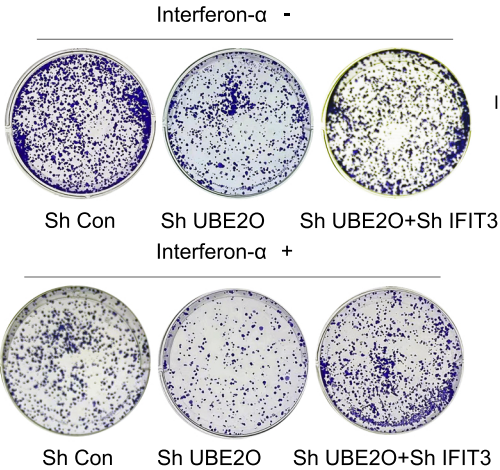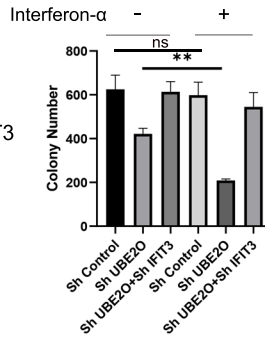

D

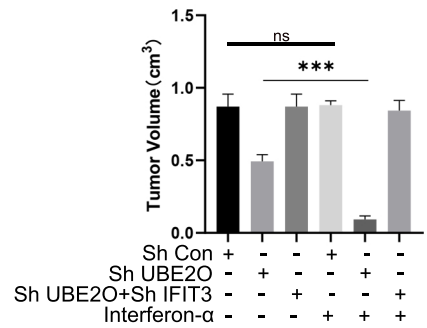

Figure S6

A

Interferon- $\alpha$  -

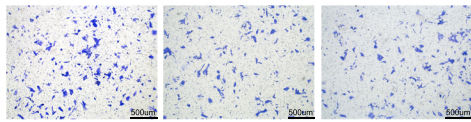

EV IFIT3-WT IFIT3-K236R

Interferon- $\alpha$  +

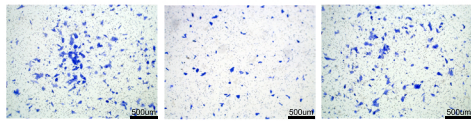

EV IFIT3-WT IFIT3-K236R

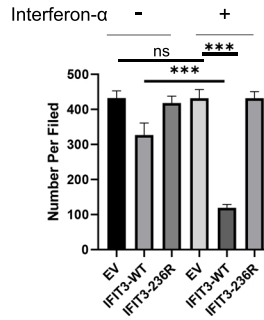

B

Interferon- $\alpha$  -

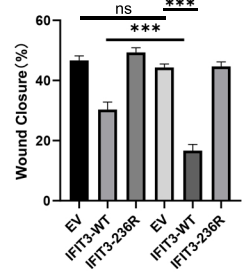

C

Interferon- $\alpha$  -

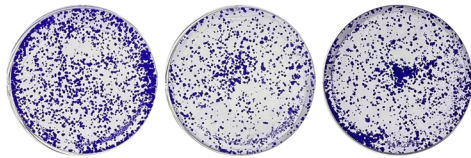

EV IFIT3-WT IFIT3-K236R

Interferon- $\alpha$  +

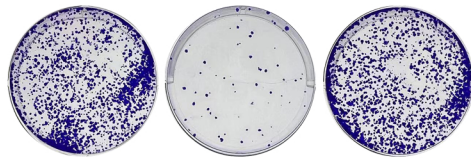

EV IFIT3-WT IFIT3-K236R

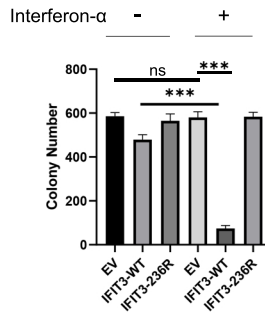

D

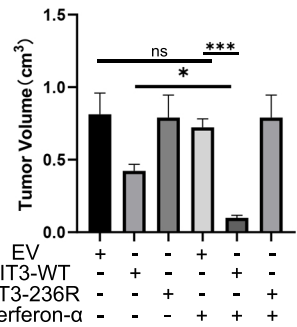

Figure S7

A

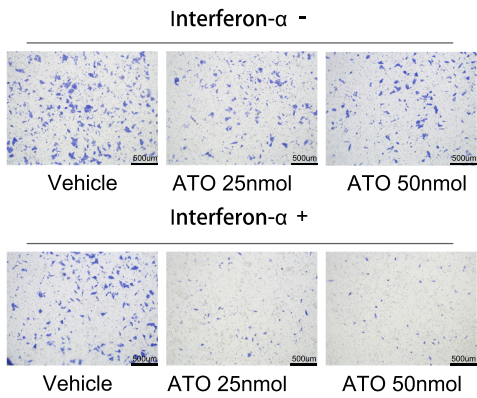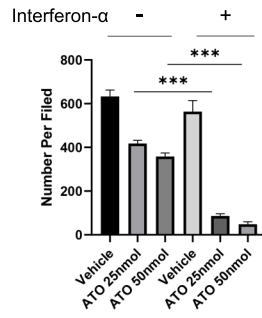

B

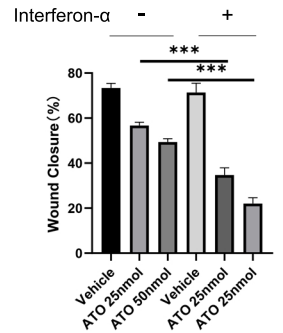

C

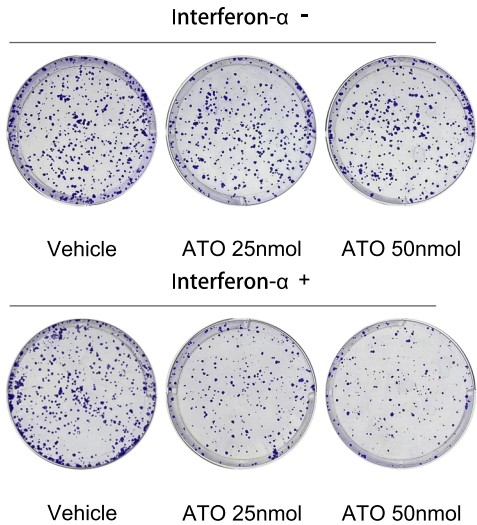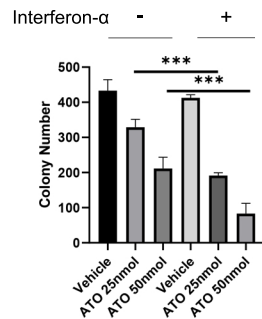

D

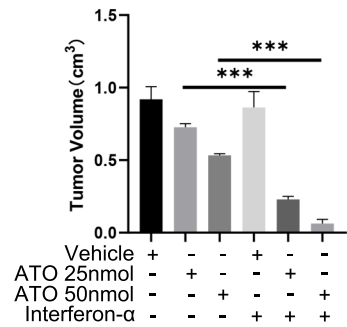

Figure S8

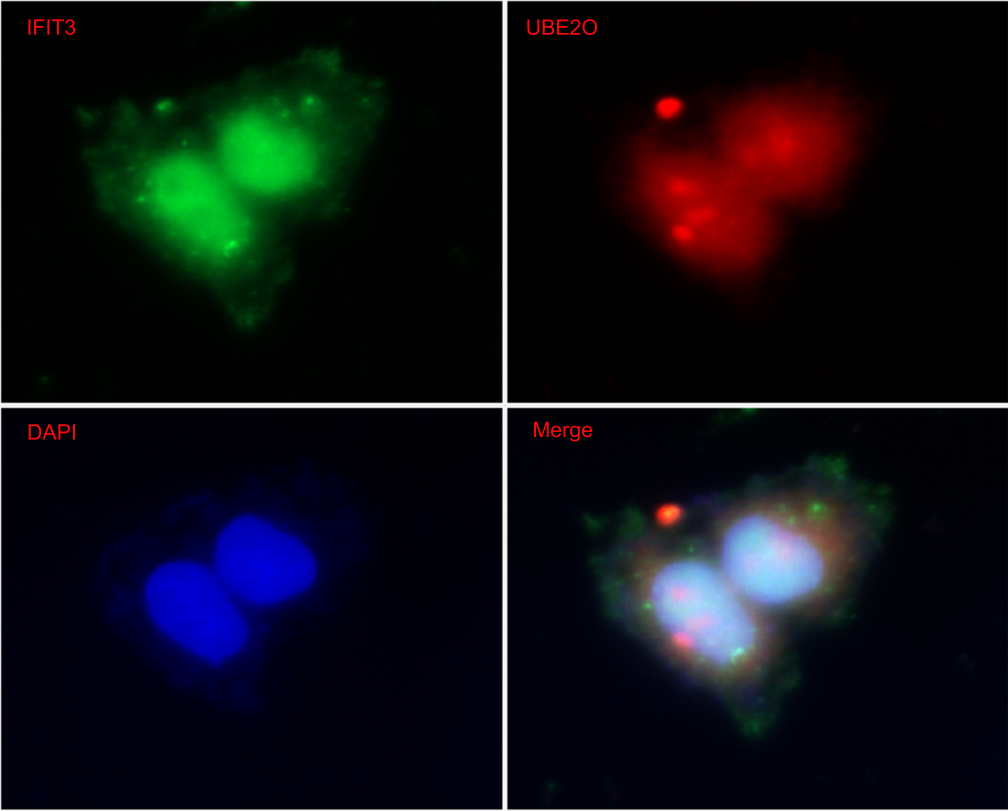



Figure S9

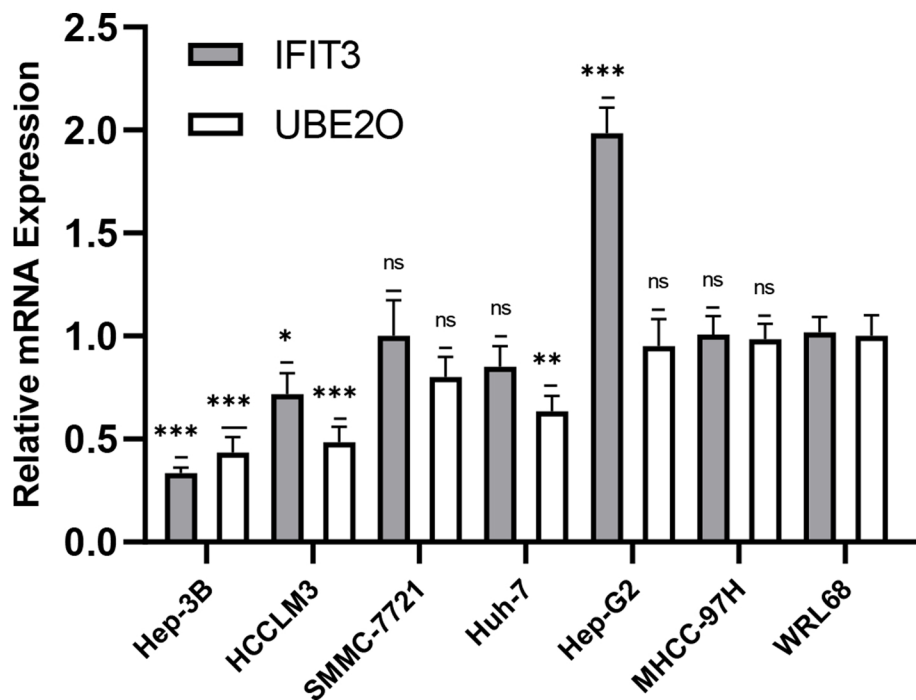

Figure S10

### Hep-3B

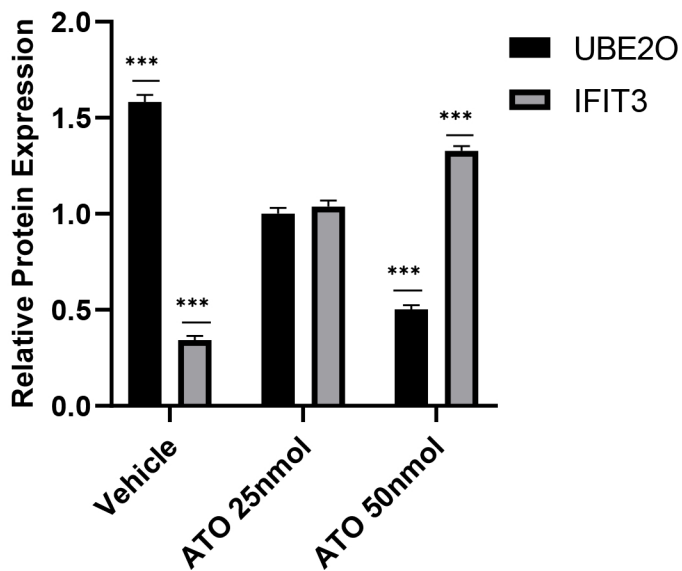

### HCCLM3

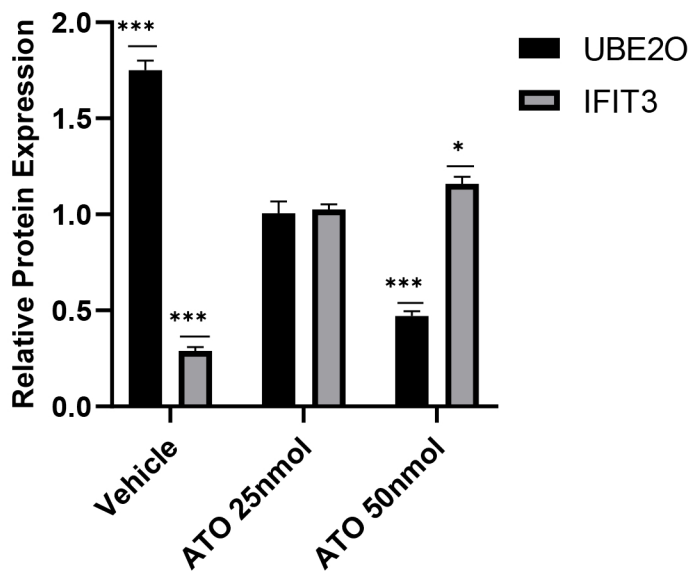

# Figure S11

A

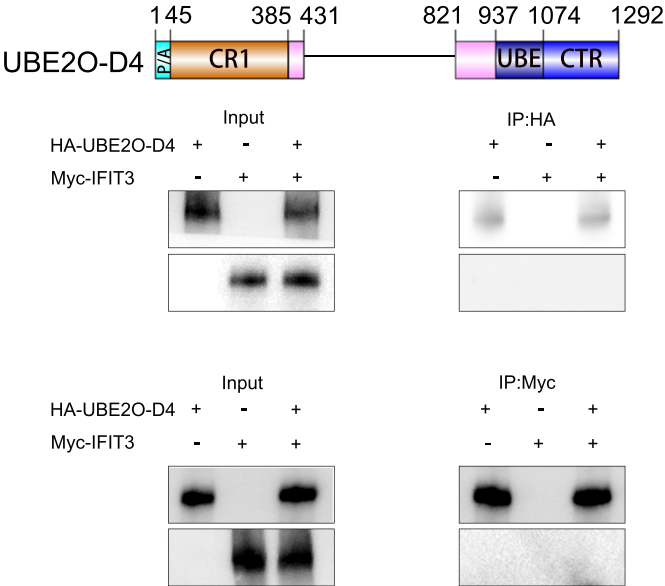

B

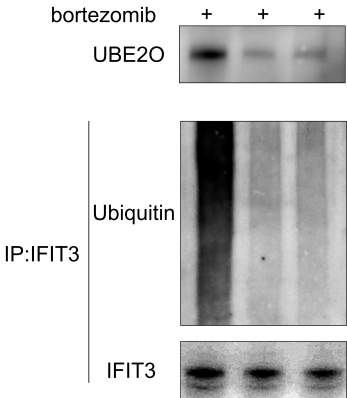

C

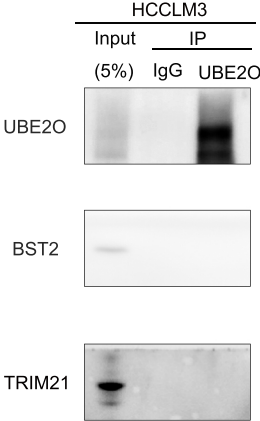

Supplement: 41419_2023_6369_MOESM1_ESM.pdf [file 41419_2023_6369_MOESM1_ESM.pdf]
